# Supplementary material for: Vitamin D Vitamers Affect Vitamin D Status Differently in Young Healthy Males
Source: PubMed Central journal article supplement (PMC5793240; doi:10.3390/nu10010012), 2017-12-23
Supplement: nutrients-10-00012-s001.pdf [file nutrients-10-00012-s001.pdf]

## Supplementary Materials for

# Vitamin D vitamers affect vitamin D status differently in young healthy males

Jette Jakobsen<sup>1\*</sup>, Elisabeth Anne Wreford Andersen<sup>2</sup>, Tue Christensen<sup>1</sup>, Rikke Andersen<sup>1</sup> and Susanne Bügel<sup>3</sup>

<sup>1</sup> National Food Institute, Technical University of Denmark, 2800 Lyngby, Denmark

<sup>2</sup> Institute of Mathematics and Computer Science, Technical University of Denmark, 2800 Lyngby, Denmark

<sup>3</sup> Department of Nutrition, Exercise and Sport, University of Copenhagen, 1958 Frederiksberg, Denmark

\* Author to whom correspondence should be addressed: [jeja@food.dtu.dk](mailto:jeja@food.dtu.dk) (J.J);

### 3. Results

#### 3.1. Characteristics of subjects

**Table S1.** Vitamin D status before and after run-in period with daily supplementation of 10 µg vitD3. Sequence is a factor with 6 levels telling which treatment pattern the subject followed.

| Before run-in, nmol/L | Vitamin D status     |               | Sequence |   |   |
|-----------------------|----------------------|---------------|----------|---|---|
|                       | After run-in, nmol/L | Difference, % |          |   |   |
| 62,1                  | 57,9                 | -7            | a        | b | c |
| 46,7                  | 59,1                 | 27            | a        | b | c |
| 61,9                  | 53,4                 | -14           | a        | c | b |
| 51,8                  | 63,7                 | 23            | a        | c | b |
| 48,4                  | 46,2                 | -5            | b        | a | c |
| 40,7                  | 33,7                 | -17           | b        | a | c |
| 59,4                  | 52,4                 | -12           | b        | c | a |
| 59,1                  | 58,4                 | -1            | b        | c | a |
| 80,8                  | 64,8                 | -20           | c        | a | b |
| 66,8                  | 59,3                 | -11           | c        | a | b |
| 69,1                  | 61,0                 | -12           | c        | b | a |
| 44,2                  | 45,2                 | 2             | c        | b | a |

### 3.2. Effects of intervention with different vitamin D vitamers

In Figure S1, Figure S2 and Figure S3 we have plots of the observed vitamin D levels in the 12 subjects during the study. Period 0 is the baseline and Sequence is a factor with 6 levels telling which treatment pattern the subject followed. Each sequence was followed by 2 subjects (dotted and line).

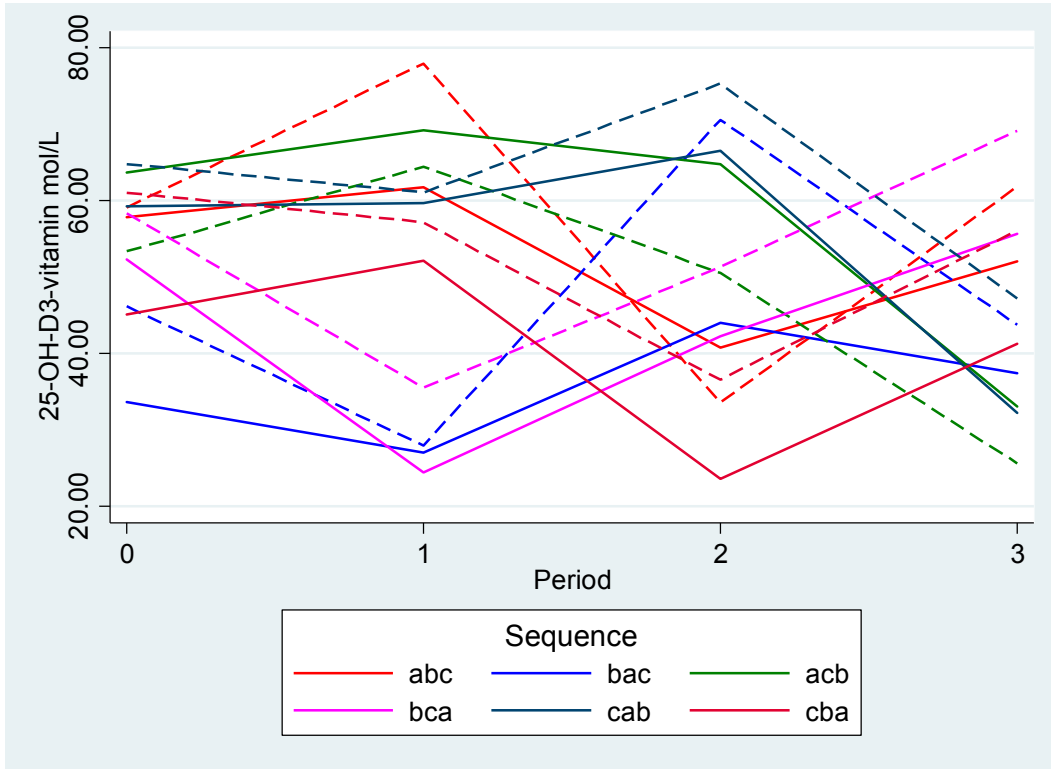

Figure S1: Observed S-25OHD3 during the study for the 12 participants.

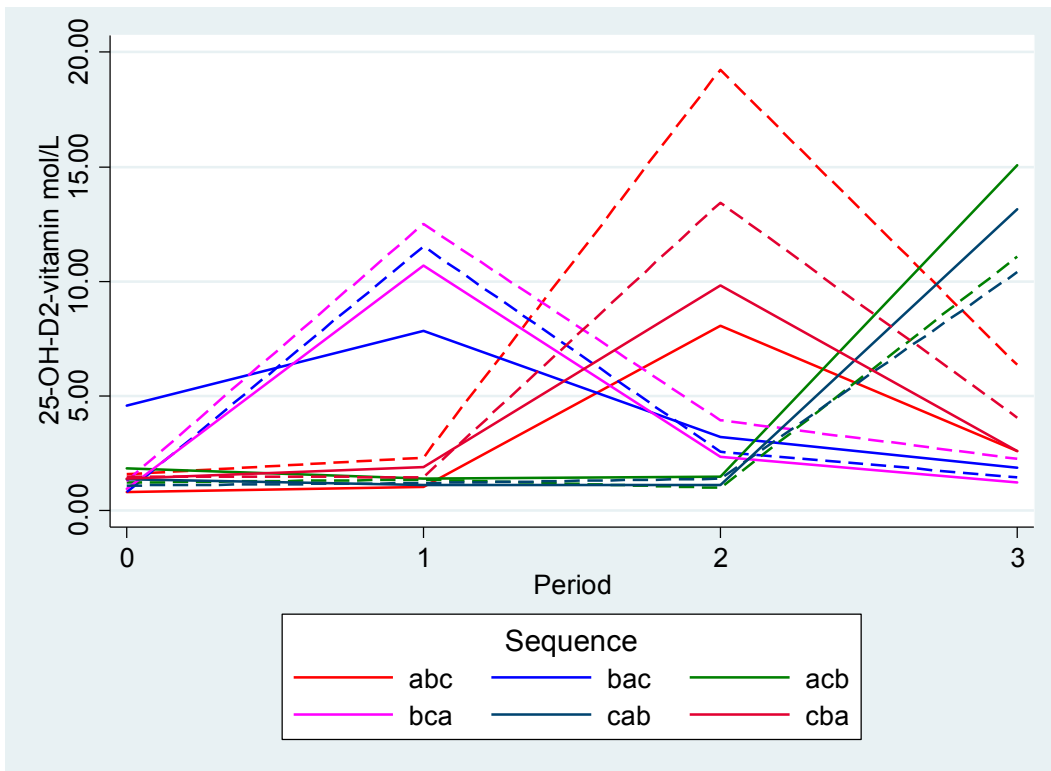

Figure S2: Observed S-25OHD2 during the study for the 12 participants.

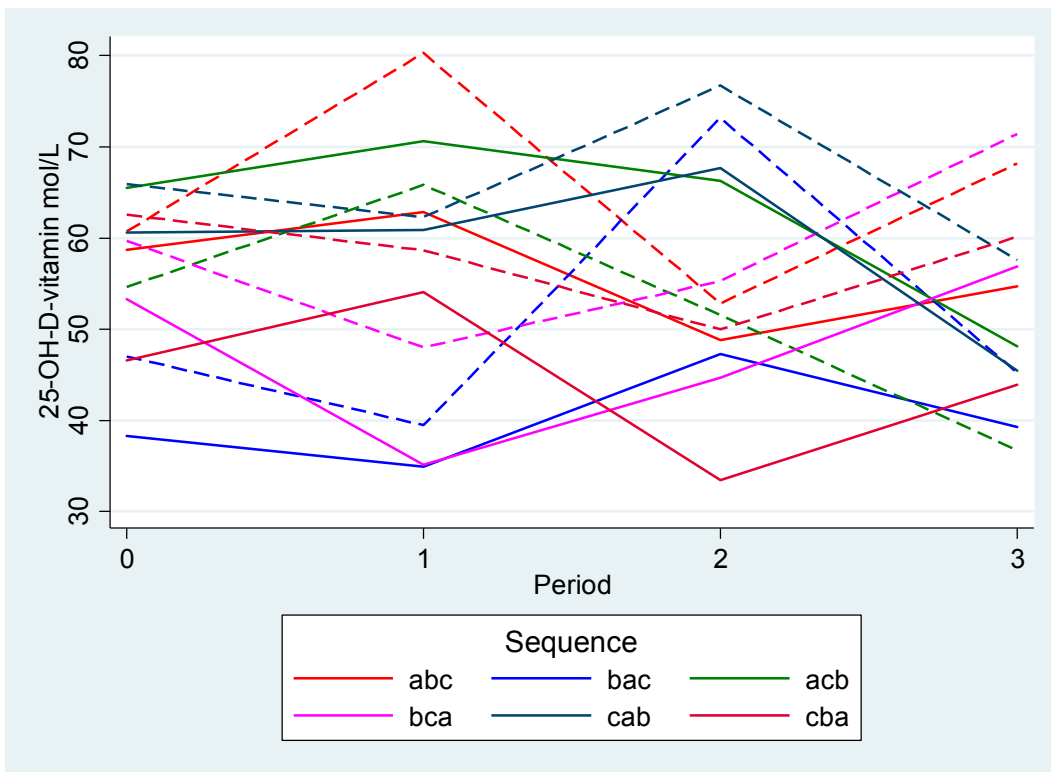

Figure S3: Observed Total S-25OHD i.e. sum of S-25OHD2 and S-25OHD3 during the study for the 12 participants.

### 3.3. Relative effectiveness of vitamin D vitamers to increase vitamin D status

The uncertainty budgets for the relative effectiveness for vitD2 compared to vitD3 and for 25OH-D3 compared to vitD3 are shown in Table S2 and Table S3, respectively. In the uncertainty budget the contribution from the uncertainty of content of vitamin D in the tablets is assumed to be included in the uncertainty of the measured vitamin D status.

**Table S2** The uncertainty budget for the relative effectiveness for vitD2 compared to vitD3.

| Parameter           | Contributors                    | Level       | Uncertainty  | Comments      |
|---------------------|---------------------------------|-------------|--------------|---------------|
| Effectiveness vitD2 | Total vitD, end of vitD3 period | 54.4 nmol/L | 6.3%         | Average of SD |
|                     | Total vitD, end of vitD2 period | 43.5 nmol/L | 6.3%         | Average of SD |
|                     | Uncertainty for factor 1.96     |             | 9.0%         | Estimated**   |
|                     | <b>Total uncertainty</b>        |             | <b>12.6%</b> |               |

**Table S3** The uncertainty budget for the relative effectiveness for 25OH-D3 compared to vitD3.

| Parameter             | Contributors                    | Level       | Uncertainty  | Comments      |
|-----------------------|---------------------------------|-------------|--------------|---------------|
| Effectiveness 25OH-D3 | Total vitD, end of vitD3 period | 54.4 nmol/L | 6.3%         | Average of SD |
|                       | Total vitD, end of vitD2 period | 63.8 nmol/L | 6.3%         | Average of SD |
|                       | Uncertainty for factor 1.96     |             | 9.0%         | Estimated**   |
|                       | <b>Total uncertainty</b>        |             | <b>12.6%</b> |               |

\*\* Factor 1.96 from Cashman et al. [27] is estimated to have similar uncertainty as the uncertainty on our primary data, as factor 1.96 is based on start and end level i.e. 9.0% which is the squareroot of the sum of the variance of the two contributors (Total vitD, end of vitD3 period and Total vitD, end of vitD2 period)
